# Supplementary material for: Dynamics of a methanol-fed marine denitrifying biofilm: 1-Impact of environmental changes on the denitrification and the co-occurrence of Methylophaga nitratireducenticrescens and Hyphomicrobium nitrativorans
Source: PeerJ journal article supplement (doi:10.7717/peerj.7497), 2019-08-13
Supplement: Figures_S1-S5.pdf [file Figures_S1-S5.pdf]

Growth conditions: Ref300N-23C (ASW, 300 mg-NO<sub>3</sub><sup>-</sup>-N/L, 2.75% NaCl, 23°C)

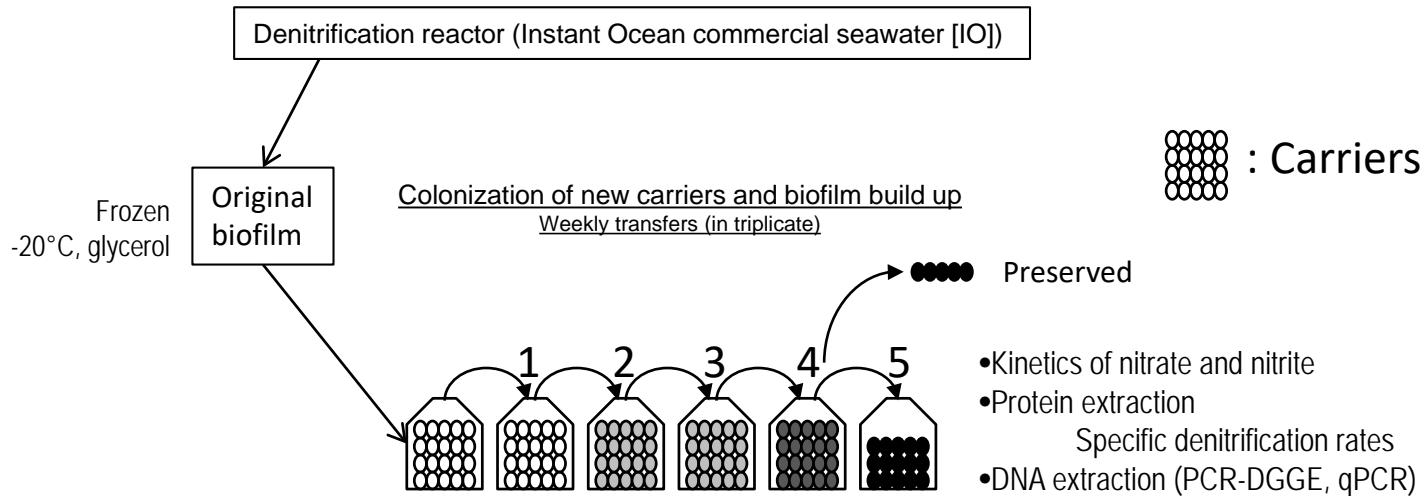

**Figure S1. Development of the reference biofilm cultures (Ref300N-23C)**

The original biofilm was thawed, scraped from the carriers and distributed to vials containing the ASW medium supplemented with 300 mg NaNO<sub>3</sub>-N/L and 0.15% methanol and 20 free carriers. These carriers were transferred 5 times in fresh medium. Concentrations of NO<sub>3</sub><sup>-</sup> and NO<sub>2</sub><sup>-</sup> were measured at regular intervals. Methanol and NaNO<sub>3</sub> were added when needed if NO<sub>3</sub><sup>-</sup> was completely depleted during the week.

## Figure S2. Schematic of the conditions used to test the denitrification capacity of the Ref300N-23C biofilm cultures

-The original biofilm was thawed, scraped from the carriers and distributed to vials containing the ASW medium supplemented with 300 mg  $\text{NaNO}_3\text{-N/L}$  and 0.15% methanol and 20 free carriers. These carriers were transferred 5 times in fresh medium. At the 5<sup>th</sup>, 10<sup>th</sup>, 15<sup>th</sup> and 20<sup>th</sup> carrier-transfers, series of three colonized carriers were distributed into other vials containing fresh culture medium and 17 new carriers. The vials were cultivated and the carriers transferred as before.

-At the 10<sup>th</sup>, 12<sup>th</sup>, 15<sup>th</sup> and 20<sup>th</sup> carrier-transfers, series of 15 freshly colonized carriers were transferred into vials containing the prescribed medium to assess the impact in varying the  $\text{NO}_3^-$ ,  $\text{NO}_2^-$  and methanol concentrations or the oxic conditions on the denitrifying activities.

-At the 25<sup>th</sup> transfer, series of 15 freshly colonized carriers were transferred into vials containing the prescribed medium to assess the impact in varying the pH, the temperature and the NaCl concentrations on the denitrifying activities. The biofilm was cultivated for two days in these prescribed conditions before the carriers to be transferred in fresh prescribed medium.

-Kinetics of  $\text{NO}_3^-$  and  $\text{NO}_2^-$  were monitored at regular intervals. Protein and DNA extractions were then performed from the biofilm and the suspended biomass.

Figure S2

### Biomass augmentation of the Ref300N-23C biofilm cultures

Growth conditions: Ref300N-23C (ASW, 300 mg-NO<sub>3</sub><sup>-</sup>-N/L, 2.75% NaCl, 23°C)

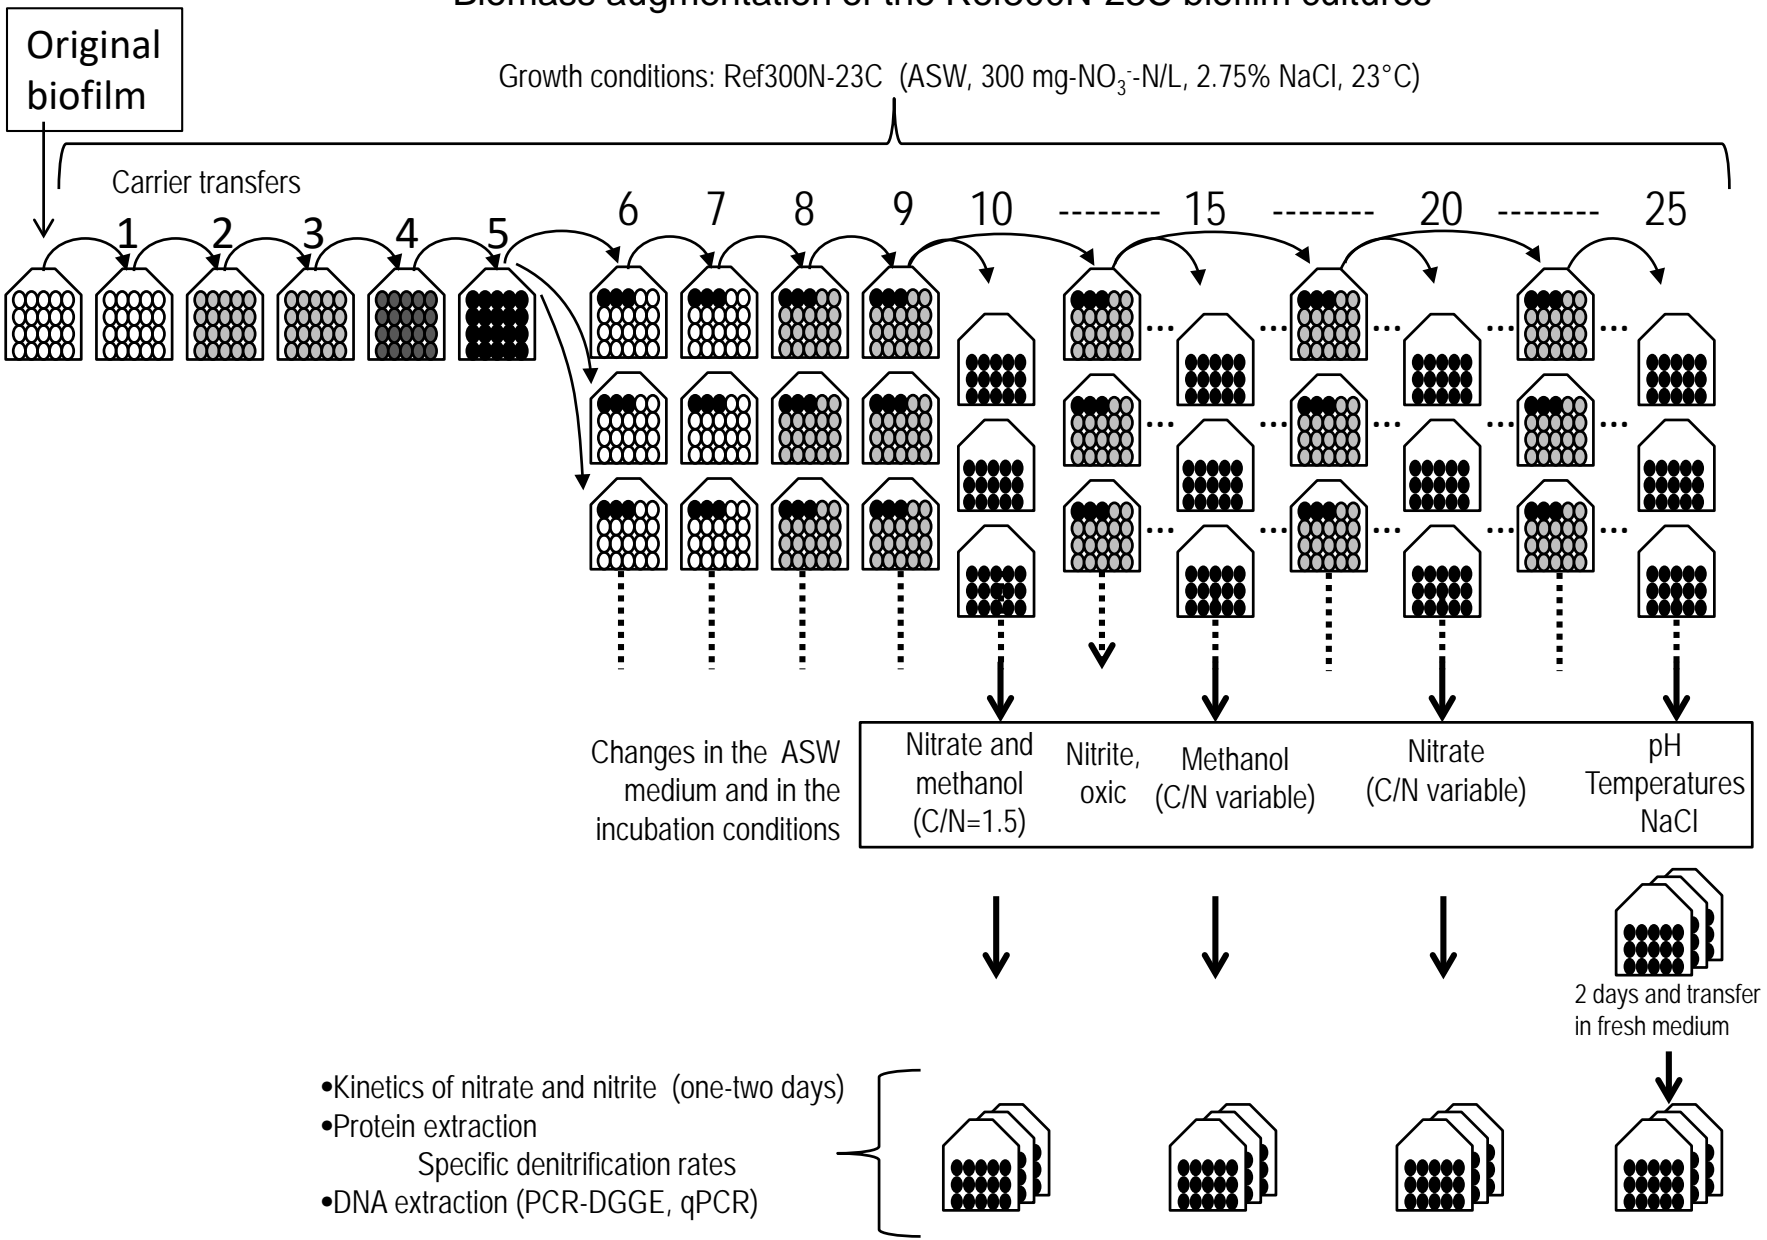

**Figure S3. Schematic of the procedures used to derive the biofilm cultures cultivated under different environmental conditions**

The original biofilm was thawed, scraped from the carriers and distributed to vials containing the ASW medium supplemented with prescribed concentrations of  $\text{NO}_3^-$ ,  $\text{NO}_2^-$ , methanol and NaCl, or containing the IO medium (Table 2), and 20 free carriers. The vials were incubated at the prescribed temperatures and at pH 8 under anoxic or oxic conditions (Table 2). In average once a week, the carriers were transferred five times into fresh prescribed medium and incubated in the same conditions. For the 2.75-5%NaCl assay, the first five transfers were incubated in the same conditions of Ref300N-23C cultures, then the three subsequent transfers were incubated in ASW medium with 5% NaCl.  $\text{NO}_3^-$  and  $\text{NO}_2^-$  concentrations were measured in each one or two days. Methanol and  $\text{NaNO}_3$  were added when needed if  $\text{NO}_3^-$  was completely depleted during the week. DNA was extracted from the biomass for PCR-DGGE and qPCR assays. During the 5<sup>th</sup> carrier-transfer cultures (or the 8<sup>th</sup> for the 2.75-5%NaCl and the 200/200N biofilm cultures), 15 carriers from each vial were transferred into their respective fresh medium, and concentrations of  $\text{NO}_3^-$  and  $\text{NO}_2^-$  were measured at regular intervals. Protein content in the whole vials was then measured.

BIOFILM CULTURE CONDITIONS

5 transfers (all under anoxic conditions)

- Ref300N-23C (ASW, 300 mg-NO<sub>3</sub><sup>-</sup>-N/L, 2.75% NaCl, 23°C): Reference biofilm cultures
- 300N-30C (ASW, 300 mg-NO<sub>3</sub><sup>-</sup>-N/L, 2.75% NaCl, 30°C)
- 900N-23C (ASW, 900 mg-NO<sub>3</sub><sup>-</sup>-N/L, 2.75% NaCl, 23°C)
- 900N-30C (ASW, 900 mg-NO<sub>3</sub><sup>-</sup>-N/L, 2.75% NaCl, 30°C)
- 0%NaCl (ASW, 300 mg-NO<sub>3</sub><sup>-</sup>-N/L, 0% NaCl, 23°C)
- 0.5%NaCl (ASW, 300 mg-NO<sub>3</sub><sup>-</sup>-N/L, 0.5% NaCl, 23°C)
- 1%NaCl (ASW, 300 mg-NO<sub>3</sub><sup>-</sup>-N/L, 1.0% NaCl, 23°C)
- 5%NaCl (ASW, 300 mg-NO<sub>3</sub><sup>-</sup>-N/L, 5% NaCl, 23°C)
- 8%NaCl (ASW, 300 mg-NO<sub>3</sub><sup>-</sup>-N/L, 8% NaCl, 23°C)
- IO (Instant Ocean, 300 mg-NO<sub>3</sub><sup>-</sup>-N/L, 23°C)
- 200/200N (ASW, 200 mg-NO<sub>3</sub><sup>-</sup>-N/L, 200 mg-NO<sub>2</sub><sup>-</sup>-N/L, 2.75% NaCl, 23°C) (8 transfers)

5 transfers under oxic conditions (Erlenmeyer flasks)

- 300N-23C oxic (ASW, 300 mg-NO<sub>3</sub><sup>-</sup>-N/L, 2.75% NaCl, 23°C)

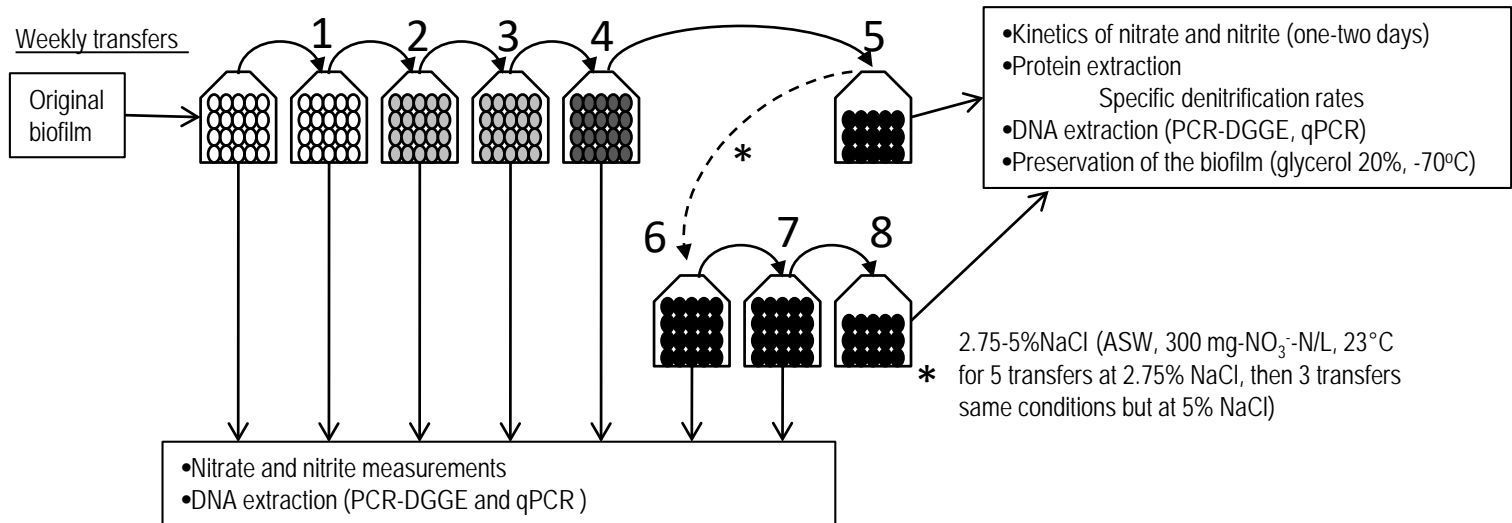

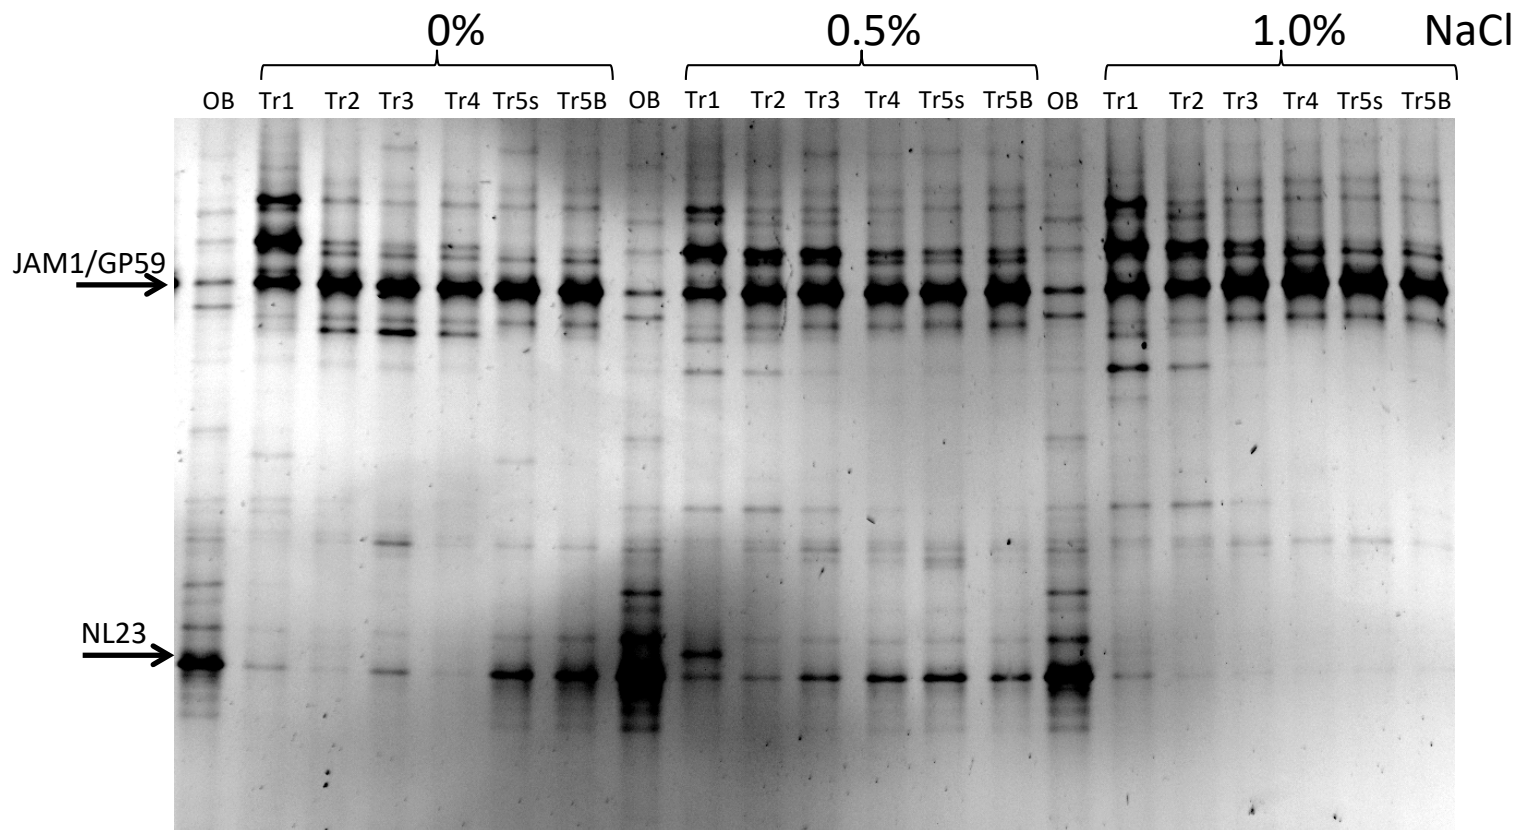

**Figure S4. Bacterial community profiles derived by PCR-DGGE of the biofilm cultures cultivated in ASW with different NaCl concentrations**

The original biofilm (OB) was cultivated in the ASW medium composed of 0%, 0.5% and 1.0% NaCl. Carriers were transferred 5 times. DNA extraction was performed at the end of the carrier-transfer cultures. PCR-DGGE migration profiles (8% polyacrylamide DGGE with a 30% to 70% denaturant gradient) of 16S rRNA gene sequences were derived from the OB, the suspended biomass of the 1<sup>st</sup> to the 5<sup>th</sup> carrier-transfers (Tr1 to Tr5S), and the carrier biofilm after the 5<sup>th</sup> carrier-transfer (Tr5B). Triplicates produced the same profiles.

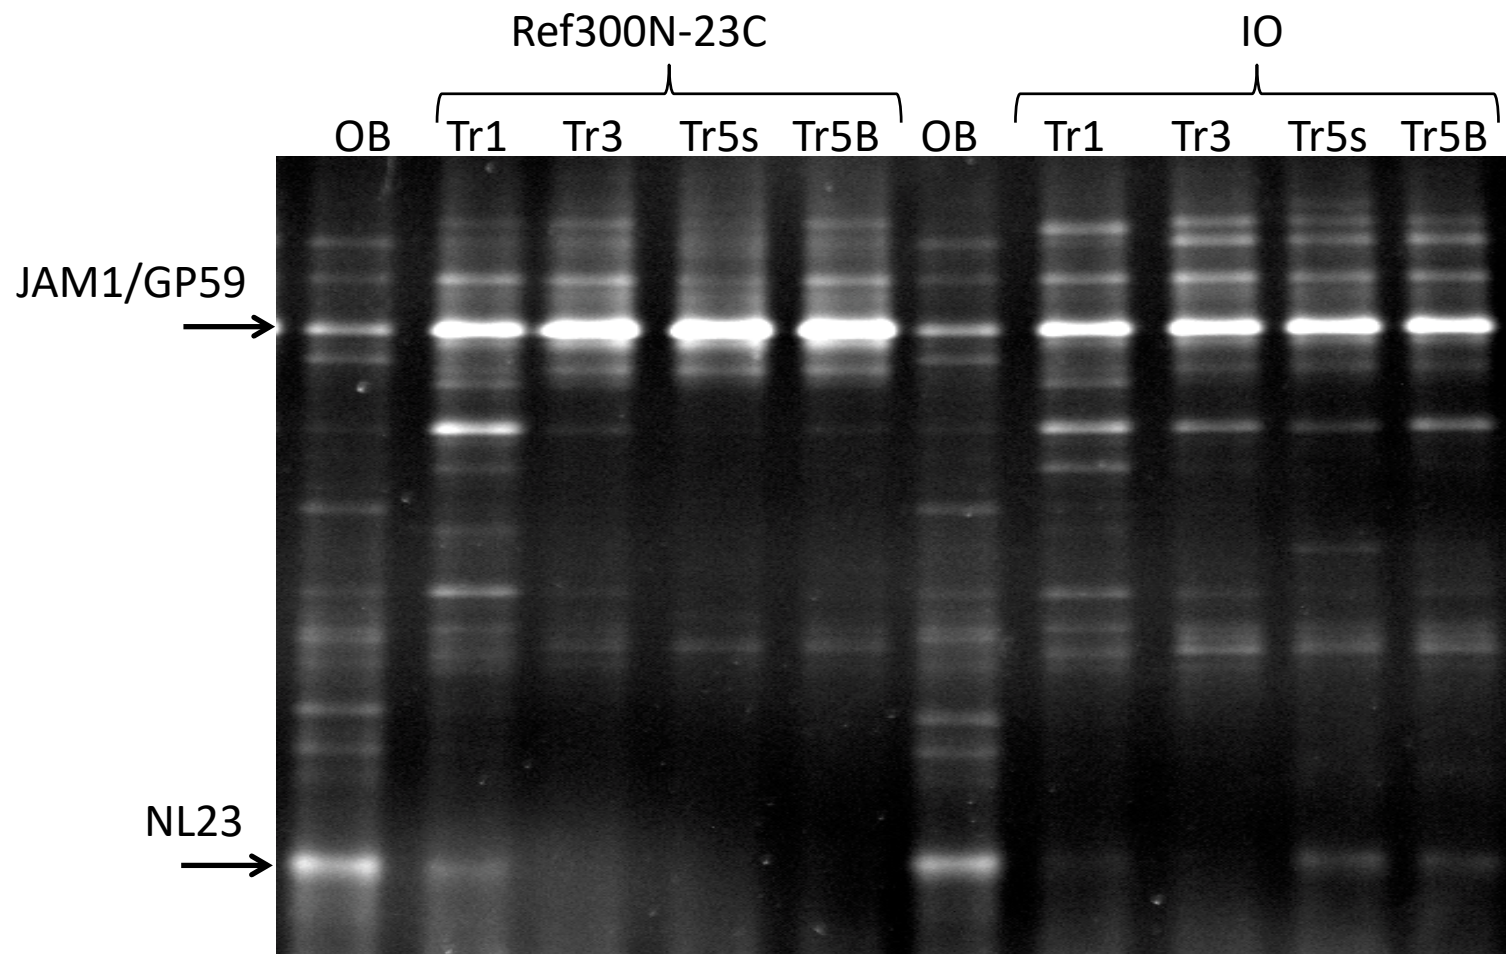

**Figure S5. Bacterial community profiles of the Ref300N-23C biofilm cultures and the IO biofilm cultures by PCR-DGGE**

The original biofilm (OB) was cultivated in the IO medium under the same conditions of the Ref300N-23C biofilm cultures (ASW). DNA was extracted from the OB, from the suspended biomass after the 1<sup>st</sup>, 3<sup>rd</sup> and 5<sup>th</sup> carrier-transfers, and from the carrier biofilm after the 5<sup>th</sup> carrier-transfers (Tr5B). 16S rRNA gene sequences were PCR amplified and segregated on PCR-DGGE (8% polyacrylamide DGGE with a 30% to 70% denaturant gradient). Triplicates produced the same profiles.
