# Supplementary material for: Dynamics of a methanol-fed marine denitrifying biofilm: 1-Impact of environmental changes on the denitrification and the co-occurrence of Methylophaga nitratireducenticrescens and Hyphomicrobium nitrativorans
Source: PeerJ. 2019 Aug 13;7:e7497. doi: 10.7717/peerj.7497 (PMC6697038; doi:10.7717/peerj.7497)
Supplement: Supplemental Information 3 [file peerj-07-7497-s003.xlsx]

## Sheet: Feuil1
Table S1: Composition of natural seawater, the INSTANT OCEAN brand salt and the artificial seaeater (ASW) used in this study
Instant Ocean						ASW			ASW recipe
Salinity = 35 ppt ; T = 25°C - values in mg/litre
Name	Formule	Natural seawater	INSTANT Ocean salts	INSTANT Ocean salts		ASW +21.4 mM NaNO3
			Information provided by Aquarium Systems	measured (with trace element and 21 mM NaNO3)
						Name	mg/L
MAJOR ELEMENTS										mg/L	MW g/mole		MW g/mole	Proportion	mg/L
Chlore	Cl	19497	19251	18894		Cl	21214.4		ASW basic recipe
Sodium	Na	11049	10757	10861 (492)		Na	11413.4		NaCl	27500	58.4	Na	23	0.393836	10830.5
Sulfate	SO4	2750	2659	2259		SO4	780.553					Cl	35.453	0.607072	16694.5
Magnesium	Mg	1318	1317	1293		Mg	1473.74		MgCl2*6H2O	10680	203.3	Mg	24.3	0.119528	1276.56
Calcium	Ca	422	398	369		Ca	181					2Cl	70.906	0.348775	3724.92
Potassium	K	408	402	376		K	598.026		MgSO4*7H2O	2000	246.47	Mg	24.3	0.0985921	197.184
Brome	Br	67	2.3	0								SO4	96.06	0.389743	779.486
Strontium	Sr	8.1	8.6	17					KCl	1000	74.55	K	39.1	0.52448	524.48
Borates	BO3	25.3	32.4	26.5								Cl	35.453	0.47556	475.56
Fluor	F	1.3	<0.05	0					CaCl2	500	111	Ca	40.1	0.361261	180.631
TRACE ELEMENTS												2Cl	70.906	0.638793	319.396
Lithium	Li	0.14	0.18	0.38					FeSO4*7H2O	1.824	278	Fe	55.845	0.200881	0.366407
Silicium	Si	0.14	Nm	0.46								SO4	96.06	0.34554	0.630264
Rubidium	Rb	0.12	Traces	Nm					KH2PO4	256	136.1	K	39.1	0.287289	73.5459
Iode	I (I , IO3)	0.06	0.22	Nm								PO4-P	31	0.227774	58.3101
Barium	Ba	0.01	<0.05	0.01					Na2HPO4	170	142	2Na	46	0.323944	55.0704
Molybdene	Mo	0.01	<0.01	0.18								PO4-P	31	0.21831	37.1127
Vanadium	V	0.002	<0.04	0.15					Trace elements added in both media
Aluminium	Al	< 0.001	<0.04	6.6					FeSO4*7H2O	0.9	278	Fe	55.845	0.200881	0.180793
Zinc	Zn	< 0.001	<0.02	0.03								SO4	96.06	0.34554	0.310986
Copper	Cu (74% CuCO3)	< 0.001	<0.03	0.12 (0.0076)		Cu	0.00763468		CuSO4*5H2O	0.03	249.7	Cu	63.546	0.254489	0.00763468
Iron	Fe	< 0.001	<0.03	0.01 (0.1808)		Fe	0.547201					SO4	96.06	0.384702	0.011541
Nickel	Ni	< 0.001	<0.04	0.1					MnSO4*H2O	0.2	169	Mn	54.84	0.324497	0.0648994
Chrome	Cr	< 0.001	<0.0006	0.4								SO4	96.06	0.568402	0.11368
Manganese	Mn	< 0.001	<0.01	0.07 (0.0649)		Mn	0.0648994
Cobalt	Co	< 0.001	<0.05	0.08					NaNO3	1819	85	Na	23	0.270588	492.2
Silver	Ag	< 0.001	not measured (nm)	0.25					(21.4 mM)			NO3	62	0.729412	1326.8
Lead	Pb	< 0.001	<0.005	0.45					Added in both media			N	14	0.164706	299.6
Cadmium	Cd	< 0.001	<0.02	0.03
Arsenic	As	Nm	<0.0002	Nm					NaOH	62	40	Na	23	0.575	35.65
Tin	Sn	Nm	Traces	Nm
Antimony	Sb	Nm	Traces	Nm
Selenium	Se	Nm	Traces	Nm
BUFFER SYSTEM AND CARBON COMPOSITION AT pH 8.2
Organic carbon	TOC :C	0.6	Nm	0.36		TOC :C	Methanol
carbonic gas	CO2 + H2CO3	0.5	Nm	0.5		CO2 + H2CO3	0.5?
Carbonates	CO3	12.2	Nm	11.6		CO3	0
Bicarbonate	HCO3	108	192	111		HCO3	0
Nitrogen compounds
Ammonium	NH4:N	0.003	Nm	0.15		NH4:N	0
Nitrite	NO2:N	0.002	Nm	Nm		NO2:N	0
Nitrate	NO3:N	0.003	0	0.01 (300)		NO3:N	300
Organic nitrogen	DON :N	0.14	Nm	0.04
N2	N2	11	Nm	Nm
Phosphorus compounds
Organic Phosphore	DOP :P	0.006	non mesuré	0.003
Phosphates	PO4 :P	0.006	0	0.002		PO4 :P	95.4227
Instant Ocean: Data available at http://www.abrisousroche.com/EauMer/Articles/Eau-de-Mer/EauDeMer.html
